# Supplementary material
Source: publisher site journal article supplement (https://www.spandidos-publications.com/3984/downloadSupplementary)

Figure S1. Correlation between PD-L1 expression and CD3<sup>+</sup> or CD4<sup>+</sup> tumor-infiltrating lymphocytes. (A) CD3<sup>+</sup> vs. PD-L1; (B) CD4<sup>+</sup> vs. PD-L1. PD-L1, programmed death ligand 1.

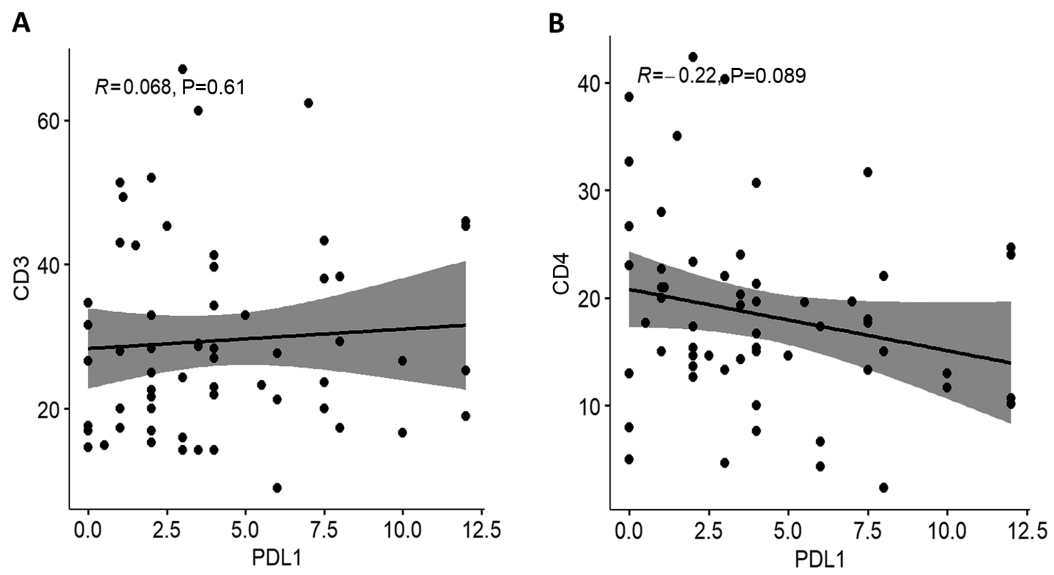

Supplement: Supplementary file 1 [file downloadSupplementary]
